# Supplementary material for: A biomimetic magnetosome: formation of iron oxide within carboxylic acid terminated polymersomes
Source: Royal Society of Chemistry journal article supplement (doi:10.1039/c9nr00498j), 2019-01-01
Supplement: c9nr00498j1.pdf [file c9nr00498j1.pdf]

## SUPPLEMENTARY INFORMATION

### A biomimetic magnetosome: Formation of iron oxide within carboxylic acid terminated polymersomes.

Jennifer Bain,<sup>a†</sup> Christopher J. Legge,<sup>a†</sup> Deborah L. Beattie,<sup>a†</sup> Annie Sahota,<sup>a†</sup> Catherine Dirks,<sup>a†</sup> Joseph Lovett,<sup>a</sup> Sarah S. Staniland.<sup>a\*</sup>

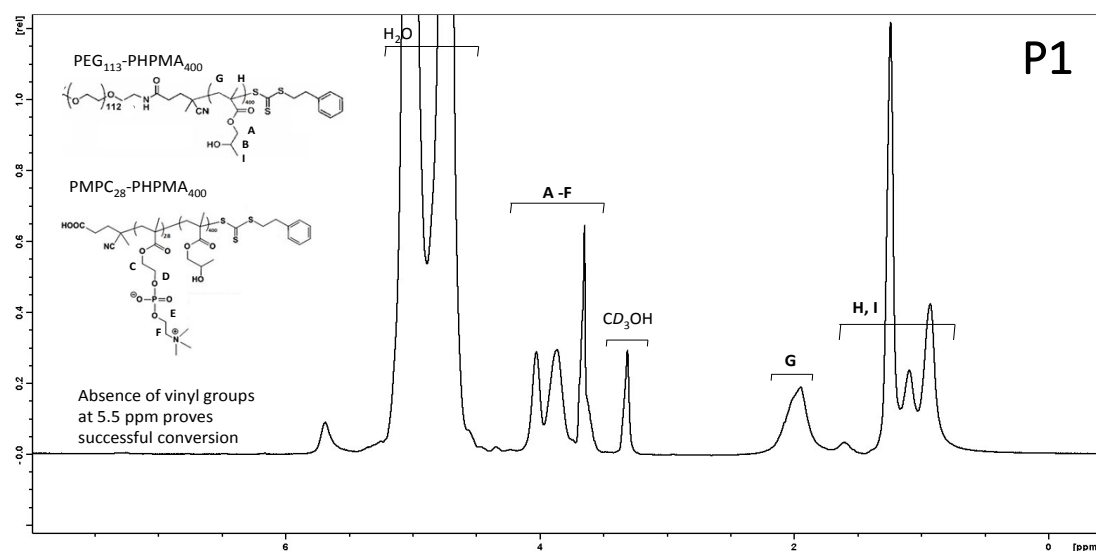

**Supplementary Information 1:** <sup>1</sup>H NMR of PEG-PHPMA/PMPC-PHPMA polymersomes to calculate conversion from monomer to polymer. Absence of vinyl peaks at 5.5 ppm confirms full conversion

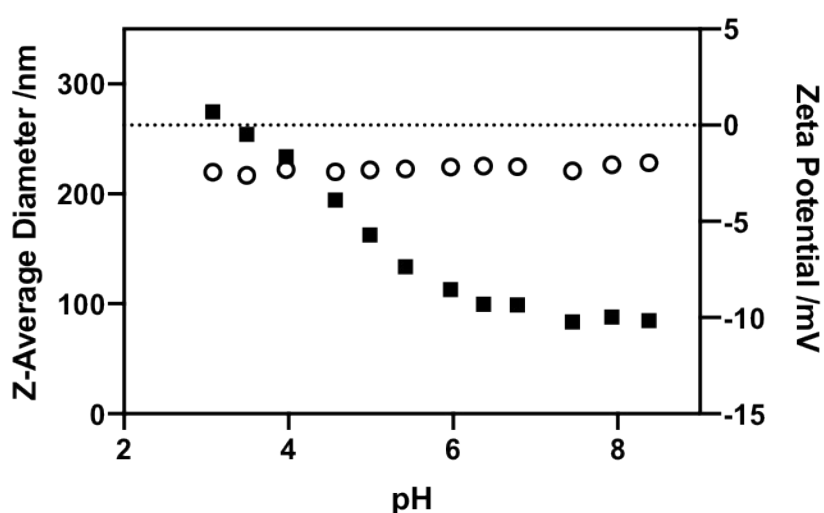

**Supplementary Information 2:** DLS (open circles) and zeta potential (squares) measurements performed on PMM<sub>28</sub>.

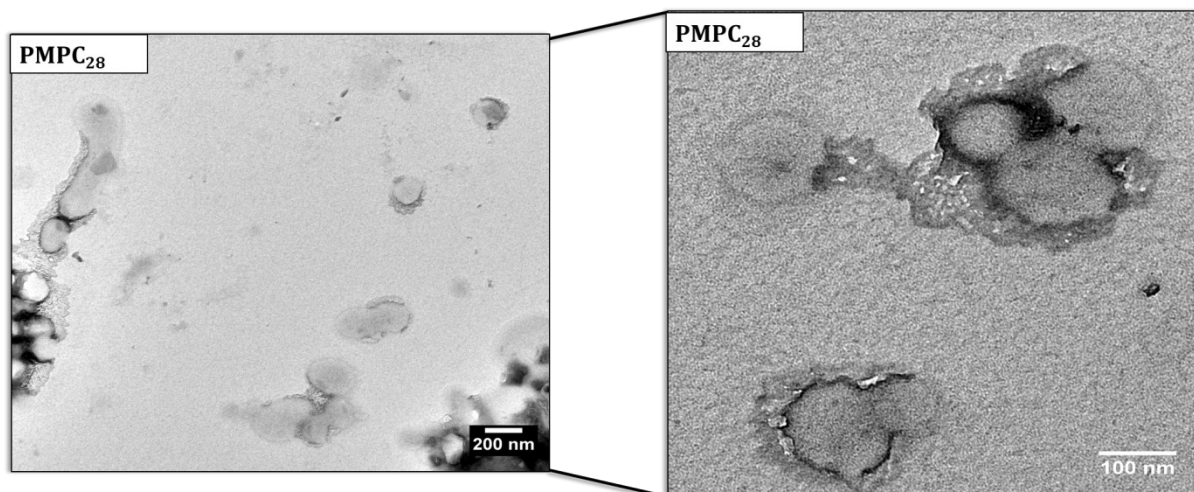

**Supplementary Information 3:** Unstained TEM images of PMM<sub>28</sub> which have been soaked in a mixed valence iron solution (10mM), (no electroporation).

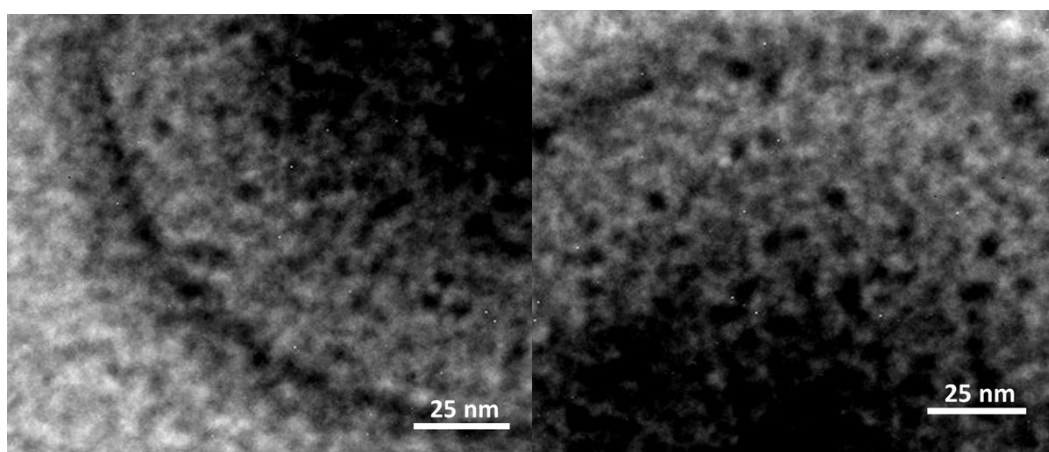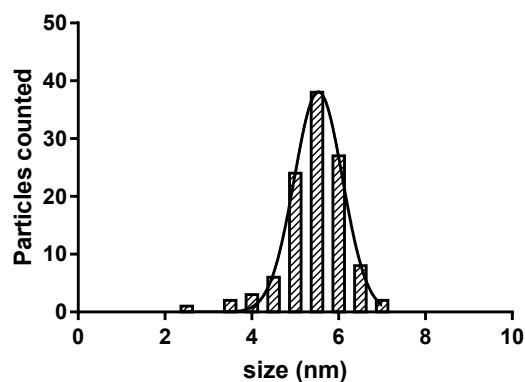

**Supplementary Information 4:** High-magnification unstained TEM images of PMM<sub>28</sub>Fe along with histogram of MNP particle diameter (from 100 particles measured), Gaussian fit 5.54nm 0.55 SD

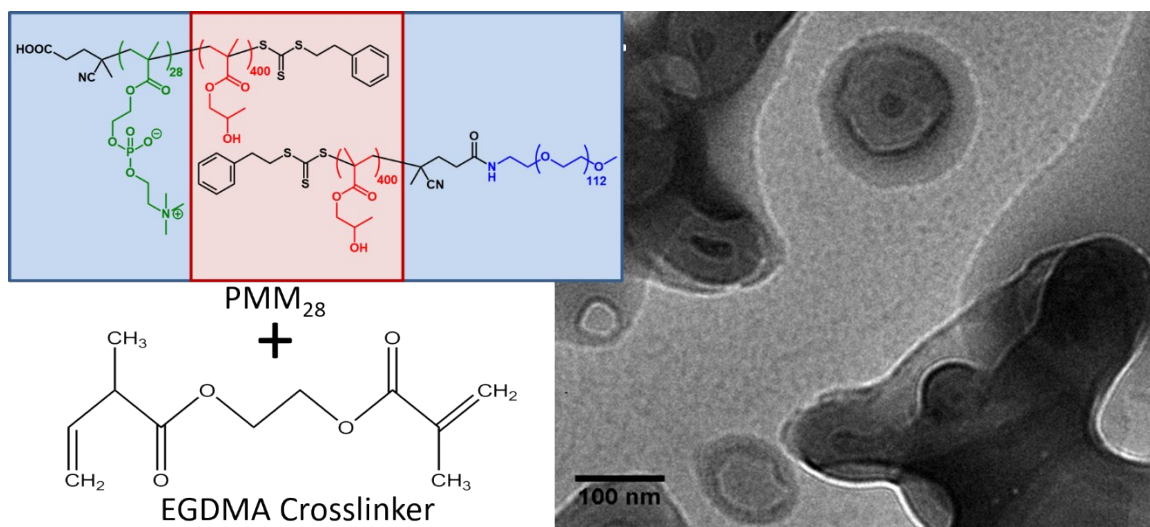

**Supplementary Information 5:** Unstained TEM images of PMM<sub>28</sub> with the addition of ethylene glycol dimethylacrylate (EGDMA) cross-linker. PMM<sub>28</sub> samples have been soaked in NaOH (10 mM) before electroporation at 750 V (5 pulses) in the presence of excess mixed valance iron solution.

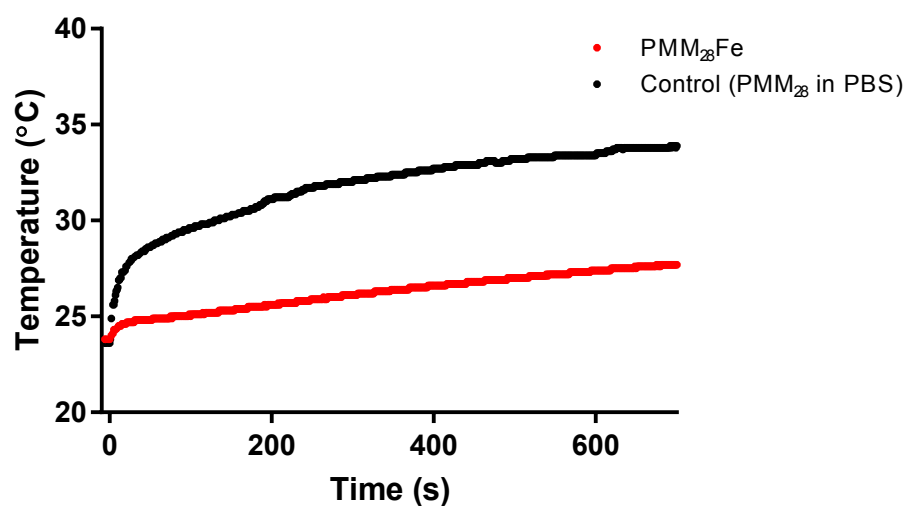

**Supplementary Information 6:** Raw hyperthermia data, for the PBS solution the polymersomes are stored in following final SEC clean-up (red) and the control unelectroporated polymer (blue) which have both been subtracted from the data shown in figure 6.
